# Supplementary material for: Imposing a curfew on the use of screen electronic devices improves sleep and daytime vigilance in adolescents
Source: bioRxiv or medRxiv preprint supplement (doi:10.1101/259309), 2018-03-21
Supplement: Supplementary file [file 259309-1.pdf]

SUPPLEMENTAL INFORMATION

Table S1: COMT genotypes repartition (N=121) and characteristics (gender, age, body mass index, Phase 1 parameters).

| Participants (N=121) with genetic (COMT) profiling |                  |                  |                  |
|----------------------------------------------------|------------------|------------------|------------------|
| Allele                                             | Val/Val          | Val/Met          | Met/Met          |
| N                                                  | 37               | 61               | 23               |
| Girls / Boys                                       | 22 / 15          | 43 / 18          | 16 / 7           |
| Age (mean $\pm$ SD)                                | 16.13 $\pm$ 2    | 15.54 $\pm$ 2.1  | 15.69 $\pm$ 1.52 |
| BMI (mean $\pm$ SD)                                | 20.88 $\pm$ 2.85 | 19.83 $\pm$ 2.53 | 20.33 $\pm$ 3.11 |
| Phase 1 parameters (mean $\pm$ sem)                |                  |                  |                  |
| -SED use after 9 pm (min)                          | 86 $\pm$ 8       | 70 $\pm$ 6       | 88 $\pm$ 12      |
| -Offscreen activities after 9 pm (min)             | 53 $\pm$ 6       | 52 $\pm$ 5       | 59 $\pm$ 9       |
| -Sleep duration (hours)                            | 7h25 $\pm$ 0.13  | 7h34 $\pm$ 0.1   | 7h28 $\pm$ 0.13  |
| -Sleep efficiency (%)                              | 89.1 $\pm$ 0.7   | 89.1 $\pm$ 0.6   | 89.8 $\pm$ 0.9   |
| -Daily mood (from 1 to 5 scale)                    | 3.58 $\pm$ 0.09  | 3.49 $\pm$ 0.07  | 3.51 $\pm$ 0.11  |

There was no significant difference between the three groups during Phase 1.

Table S2: Repartition between *Active* and *Passive* participants and their characteristics (gender, age)

| Participants included in PHASE 1 |              |           |           |           |           |
|----------------------------------|--------------|-----------|-----------|-----------|-----------|
| Total Participants               | Total        | 12-13 y.o | 14-15 y.o | 16-17 y.o | 18-19 y.o |
| N                                | 569          | 140       | 168       | 138       | 123       |
| Girls   Boys                     | 299   270    | 72   68   | 70   98   | 83   55   | 74   49   |
| Age (mean ± SD)                  | 15,35 ± 2,1  |           |           |           |           |
| Active Participants              | Total        | 12-13 y.o | 14-15 y.o | 16-17 y.o | 18-19 y.o |
| N                                | 315          | 68        | 72        | 93        | 82        |
| Girls   Boys                     | 203   112    | 42   26   | 42   30   | 62   31   | 57   25   |
| Age (mean ± SD)                  | 15,69 ± 2,12 |           |           |           |           |
| Passive Participants             | Total        | 12-13 y.o | 14-15 y.o | 16-17 y.o | 18-19 y.o |
| N                                | 254          | 72        | 96        | 45        | 41        |
| Girls   Boys                     | 96   158     | 30   42   | 28   68   | 21   24   | 17   24   |
| Age (mean ± SD)                  | 14,93 ± 2    |           |           |           |           |

| Participants included in both PHASES 1 & 2 |              |           |           |           |           |
|--------------------------------------------|--------------|-----------|-----------|-----------|-----------|
| Total Participants                         | Total        | 12-13 y.o | 14-15 y.o | 16-17 y.o | 18-19 y.o |
| N                                          | 467          | 120       | 151       | 111       | 85        |
| Girls   Boys                               | 243   224    | 61   59   | 64   87   | 67   44   | 51   34   |
| Age (mean ± SD)                            | 15,02 ± 1,9  |           |           |           |           |
| Active Participants                        | Total        | 12-13 y.o | 14-15 y.o | 16-17 y.o | 18-19 y.o |
| N                                          | 183          | 36        | 43        | 58        | 46        |
| Girls   Boys                               | 120   63     | 17   19   | 28   15   | 43   15   | 32   14   |
| Age (mean ± SD)                            | 15,73 ± 2    |           |           |           |           |
| Passive Participants                       | Total        | 12-13 y.o | 14-15 y.o | 16-17 y.o | 18-19 y.o |
| N                                          | 284          | 84        | 108       | 53        | 39        |
| Girls   Boys                               | 123   161    | 44   40   | 36   72   | 24   29   | 19   20   |
| Age (mean ± SD)                            | 14,84 ± 1,95 |           |           |           |           |

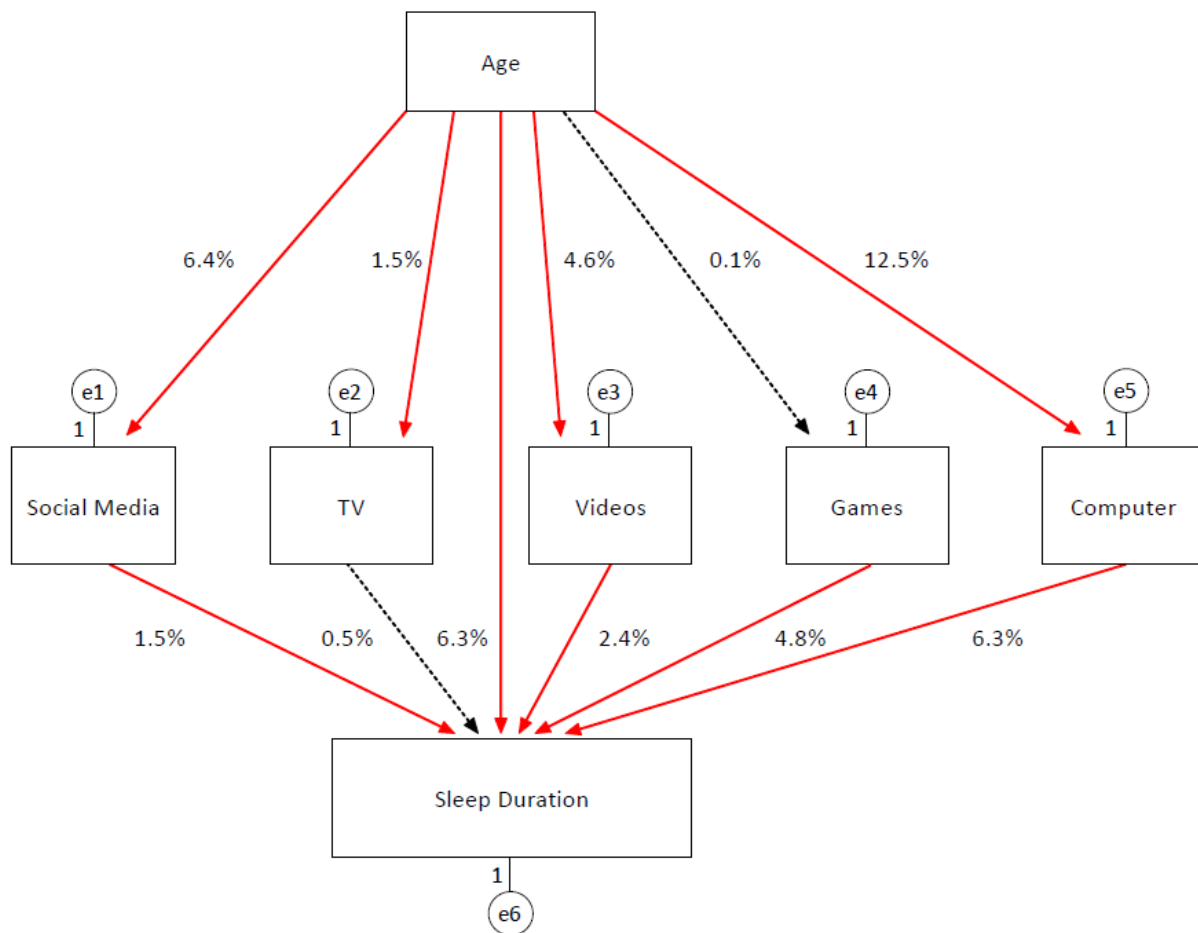

**Fig. S1: Contribution of age and type of SED activities after 9 pm to sleep duration during pre-school nights using Structural Equation Modeling**

Age and time spent on each SED activity after 9 pm collectively explained 37.8% of the variance of the variable sleep duration. While age and time spent on computer, games, videos and social media after 9 pm had significant unique contributions to sleep duration (red arrows), time spent watching TV after 9 pm did not significantly affect sleep duration (dotted black arrow).
